# Supplementary material for: Primary hyperoxaluria in Italy: the past 30 years and the near future of a (not so) rare disease
Source: J Nephrol. 2022 Feb 26;35(3):841–50. doi: 10.1007/s40620-022-01258-4 (PMC8995259; doi:10.1007/s40620-022-01258-4)
Supplement: Supplementary file 1 — Supplementary file1 (PDF 123 KB) [file 40620_2022_1258_MOESM1_ESM.pdf]

| <b>Name</b>                 | <b>Institution</b>                                           | <b>City</b>     |
|-----------------------------|--------------------------------------------------------------|-----------------|
| <b>Francesca Becherucci</b> | A.O. Universitaria Meyer                                     | Firenze         |
| <b>Bertuzzi Veronica</b>    | Ospedale S. Maria della Misericordia                         | Urbino          |
| <b>Tortora Giada</b>        | Ospedali Riuniti                                             | Ancona          |
| <b>Cristina Malaventura</b> | Ospedale Ferrara                                             | Ferrara         |
| <b>Gabriele Donati</b>      | AOU P. S. Orsola-Malpighi                                    | Bologna         |
| <b>Andrea Pasini</b>        | AOU P. S. Orsola-Malpighi                                    | Bologna         |
| <b>Berardi Sonia</b>        | AO Policlinico S. Orsola - Malpighi                          | Bologna         |
| <b>Maggiore Umberto</b>     | Azienda Ospedaliero-Universitaria di <i>Parma</i>            | Parma           |
| <b>Valeriana Colombo</b>    | Ospedale Niguarda                                            | Milano          |
| <b>Lorenzo D'Antiga</b>     | AO Papa Giovanni XXIII – Bergamo                             | Bergamo         |
| <b>Delprete Dorella</b>     | Azienda Ospedaliera di Padova - Dimed                        | Padova          |
| <b>Marchini Francesco</b>   | Azienda Ospedaliera di Padova                                | Padova          |
| <b>Boero Roberto</b>        | Ospedale Martini                                             | Torino          |
| <b>Tandoi Francesco</b>     | Ospedale Molinette                                           | Torino          |
| <b>Cussa Davide</b>         | Ospedale Molinette                                           | Torino          |
| <b>Biancone Luigi</b>       | Ospedale Molinette                                           | Torino          |
| <b>Tognarelli Giuliana</b>  | AOU S. Luigi Gonzaga                                         | Orbassano (TO)  |
| <b>Chiarinotti Doriana</b>  | AOU Maggiore della Carità                                    | Novara          |
| <b>Diego Bellino</b>        | Ospedale S. Martino                                          | Genova          |
| <b>Gian Marco Ghiggeri</b>  | IRCCS IP Giannina Gaslini                                    | Genova          |
| <b>Paglialonga Fabio</b>    | IRCCS Cà Granda Ospedale Maggiore Polilinico Milano          | Milano          |
| <b>Taroni Francesca</b>     | IRCCS Cà Granda Ospedale Maggiore Polilinico Milano          | Milano          |
| <b>Gentile Anna</b>         | Ospedale di Trento                                           | Trento          |
| <b>Di Palma Teresa</b>      | Ospedale di Trento                                           | Trento          |
| <b>Tubaro Martina</b>       | Pediatria Ospedale Santa Maria degli angeli                  | Pordenone       |
| <b>Monardo Paolo</b>        | Ospedale Papardo                                             | Messina         |
| <b>Mario Giordano</b>       | Ospedale Policlinico di Bari                                 | Bari            |
| <b>Diletta Torres</b>       | Ospedale Policlinico di Bari                                 | Bari            |
| <b>Aceto Gabriella</b>      | Ospedale Policlinico di Bari                                 | Bari            |
| <b>Malgieri Gabriele</b>    | Ospedale Santobono di Napoli                                 | Napoli          |
| <b>Miriam Zacchia</b>       | AOU Università degli Studi della Campania "Luigi Vanvitelli" | Napoli          |
| <b>Ferretti Alfonso</b>     | Ospedale Santobono                                           | Napoli          |
| <b>Salvatore Coppola</b>    | UOSD Nefrologia e dialisi, P.O. Piedimonte Matese            | Caserta         |
| <b>Cuomo Vincenzo</b>       | UOSD Nefrologia e dialisi, P.O. Piedimonte Matese            | Caserta         |
| <b>Catalano Francesco</b>   | Ospedale Bianchi Melacrino Morelli                           | Reggio Calabria |
